# Supplementary material
Source: PubMed Central journal article supplement (PMC2528107)
Supplement: pp.108.120808_1.pdf [file pp.108.120808_1.pdf]

Supplemental Table 1: BLAST search of homologous RNAs, potential targets for theoretical (HSVd)siRNAs-directed RNA silencing in *Nicotiana* genus plants.

|                                                                                                                                   |      |                            |      |  |
|-----------------------------------------------------------------------------------------------------------------------------------|------|----------------------------|------|--|
| <b>&gt;gb AY553216.1 <i>N. tabacum</i> hexokinase 3 (Hxk3) mRNA. Identities: 19/20 (95%) – Gaps: 0/20 (0%)</b>                    |      |                            |      |  |
| HSVd                                                                                                                              | 23   | CAAAGGCATGCAAAGAAA         | 42   |  |
|                                                                                                                                   |      |                            |      |  |
| Sbjct                                                                                                                             | 678  | CAAAGCCATGCAAAGAAA         | 697  |  |
| <b>&gt;gb AY368905.1 <i>N. benthamiana</i> Hsp90-2 mRNA. Identities: 18/19 (94%) – Gaps: 0/19 (0%)</b>                            |      |                            |      |  |
| HSVd                                                                                                                              | 175  | CCCTTCTTCTTACCTTCT         | 193  |  |
|                                                                                                                                   |      |                            |      |  |
| Sbjct                                                                                                                             | 1457 | CCCTTCTTCTTAGCTTCT         | 1439 |  |
| <b>&gt;emb AJ617088.1 <i>N. plumbaginifolia</i> cDNA-AFLP fragment. Identities: 18/19 (94%) – Gaps: 0/19 (0%)</b>                 |      |                            |      |  |
| HSVd                                                                                                                              | 170  | ATCGTCCCTTCTTCTTAC         | 188  |  |
|                                                                                                                                   |      |                            |      |  |
| Sbjct                                                                                                                             | 110  | ATCGTCACTTCTTCTTAC         | 128  |  |
| <b>&gt;gb AY383599.2 <i>N. tabacum</i> proton P-ATPase (nha1) mRNA. Identities: 22/24 (91%) – Gaps: 1/24 (4%)</b>                 |      |                            |      |  |
| HSVd                                                                                                                              | 188  | CCTTCTTCTGGCTCTTCTGGAGA    | 211  |  |
|                                                                                                                                   |      |                            |      |  |
| Sbjct                                                                                                                             | 1807 | CCTTCTTCTAG-CTTCTTCTGGAGA  | 1829 |  |
| <b>&gt;gb EF421430.1 <i>N. tabacum</i> dihydroflavonol 4-reductase (Dfr2) mRNA. Identities: 18/20 (90%) – Gaps: 0/20 (0%)</b>     |      |                            |      |  |
| HSVd                                                                                                                              | 183  | CTTACCTTCTTCTGGCTCT        | 202  |  |
|                                                                                                                                   |      |                            |      |  |
| Sbjct                                                                                                                             | 171  | CTTACCTTCTTCTGTCT          | 152  |  |
| <b>&gt;gb AF211540.1 <i>N. tabacum</i> Avr9/Cf-9 elicited protein 75 (ACRE75) mRNA. Identities: 18/20 (90%) – Gaps: 0/20 (0%)</b> |      |                            |      |  |
| HSVd                                                                                                                              | 177  | CTTCTTCTTACCTTCTTCT        | 196  |  |
|                                                                                                                                   |      |                            |      |  |
| Sbjct                                                                                                                             | 204  | CTTCTTCTTATCTTCTCT         | 223  |  |
| <b>&gt;gb AY169238.2 <i>N. tabacum</i> DNA topoisomerase II mRNA. Identities: 23/26 (88%) – Gaps: 1/26 (3%)</b>                   |      |                            |      |  |
| HSVd                                                                                                                              | 176  | CCTTCTTCTTACCTTCT-TCTGGCT  | 200  |  |
|                                                                                                                                   |      |                            |      |  |
| Sbjct                                                                                                                             | 3540 | CCTTCTTCTTATCTTCTCTCTAGCT  | 3515 |  |
| <b>&gt;emb AJ718328.1  <i>N. tabacum</i> cDNA-AFLP-fragment BSTT42-135. Identities: 23/26 (88%) – Gaps: 1/26 (3%)</b>             |      |                            |      |  |
| HSVd                                                                                                                              | 176  | CCTTCTTCTTACCTTCT-TCTGGCT  | 200  |  |
|                                                                                                                                   |      |                            |      |  |
| Sbjct                                                                                                                             | 58   | CCTTCTTCTTATCTTCTCTCTAGCT  | 33   |  |
| <b>&gt;emb X56263.1 <i>N. tabacum</i> auxin-induced mRNA (pCNT103). Identities: 25/29 (86%) - Gaps: 0/29 (0%)</b>                 |      |                            |      |  |
| HSVd                                                                                                                              | 177  | CTTCTTCTTACCTTCTTCTGGCTTCT | 205  |  |
|                                                                                                                                   |      |                            |      |  |
| Sbjct                                                                                                                             | 392  | CTTCTTCTTACCTTCTTCTGGCTTCT | 364  |  |
