# Supplementary material
Source: PubMed Central journal article supplement (PMC2528107)
Supplement: pp.108.120808_2.pdf [file pp.108.120808_2.pdf]

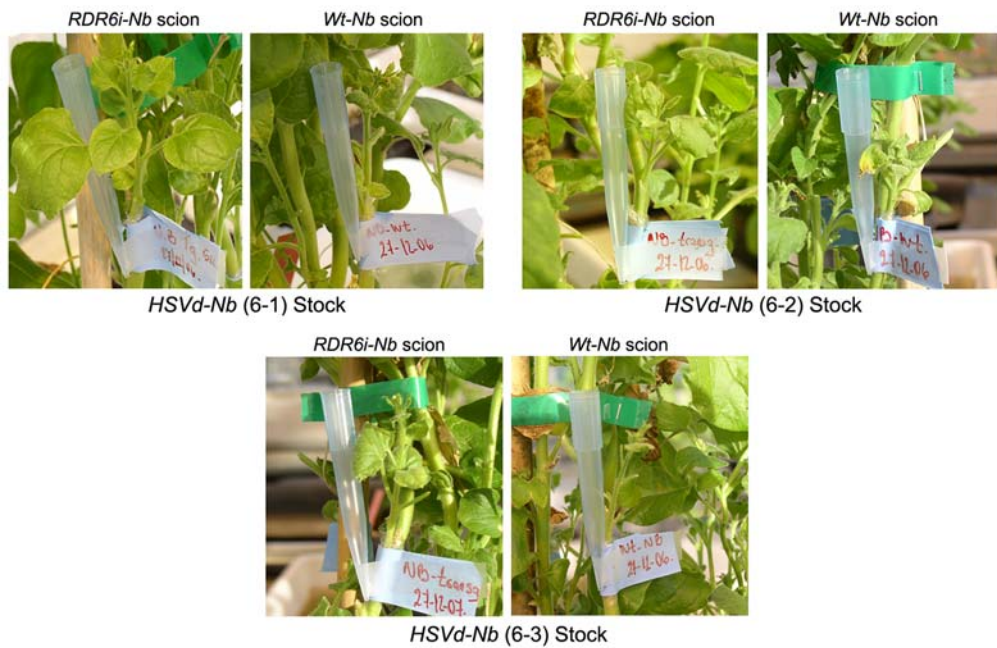

**Supplemental figure 1.** General view of Wt-Nb and rdr6i-Nb scions at 17 days after grafting. Two week-old Wt-Nb and rdr6i-Nb scions were grafted onto symptomatic transgenic HSVd-Nb stocks, and kept at 28°C. General symptoms induced by HSVd in diverse Wt-Nb scion compared with rdr6i-Nb scions grafted onto identical stocks at 17 days after grafting.
