# Supplementary material
Source: PubMed Central journal article supplement (PMC2528107)
Supplement: pp.108.120808_3.pdf [file pp.108.120808_3.pdf]

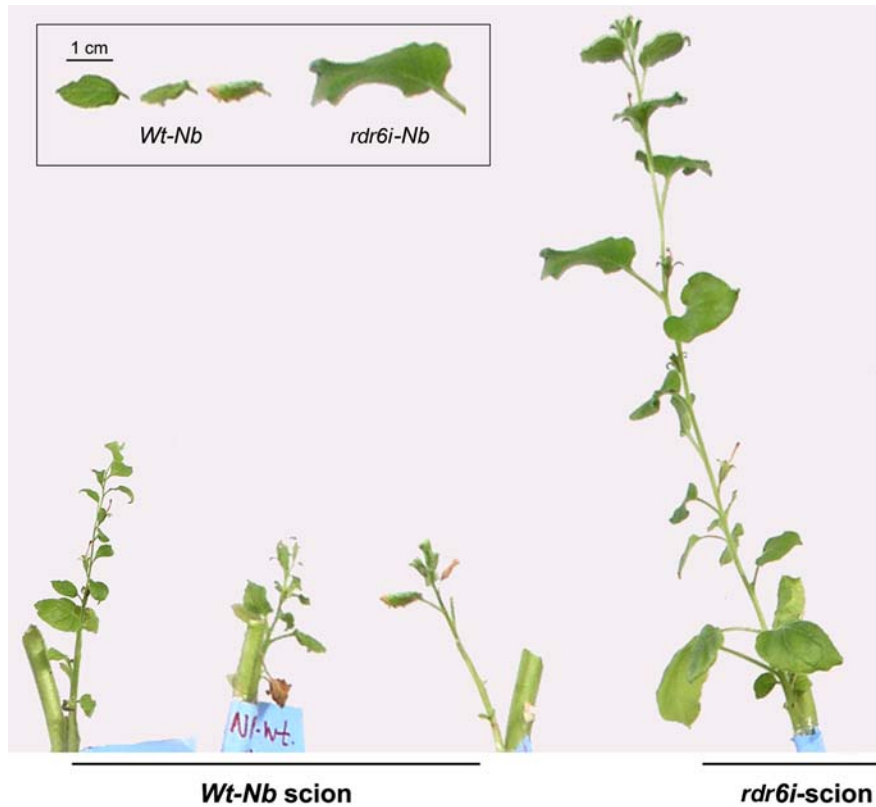

**Supplemental figure 2.** Symptoms induced by HSVd in diverse Wt-Nb scion compared with a representative *rdr6i*-Nb scion at 45 days after grafting. The upper panel (B) showed a magnified image of the representative leaves of Wt-Nb and *rdr6i*-Nb scions. In the leaves of the Wt-Nb scion, the size reduction and chlorosis followed by necrosis are seen, as described in the text.
