# Supplementary material
Source: PubMed Central journal article supplement (PMC2528107)
Supplement: pp.108.120808_4.pdf [file pp.108.120808_4.pdf]

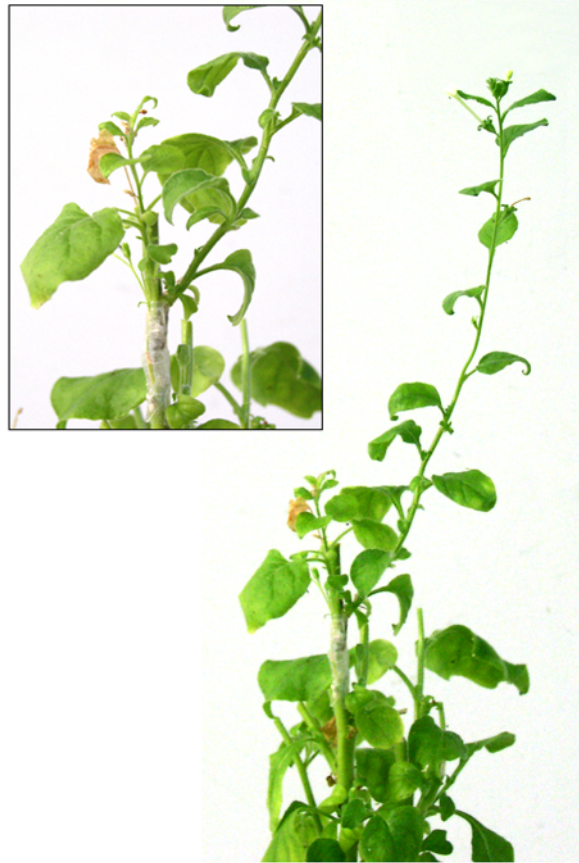

**Supplemental figure 3.** Symptoms induced by HSVd in a Wt-Nb scion compared with an *rdr6i*-Nb scion at 45 days after grafting onto the same HSVd-Nb (stock) branch. The insert panel shows a magnified image of the graft; the size reduction and chlorosis followed by necrosis are coincident with those observed in the other grafts described in the text.
