# Supplementary material
Source: PubMed Central journal article supplement (PMC2528107)
Supplement: pp.108.120808_5.pdf [file pp.108.120808_5.pdf]

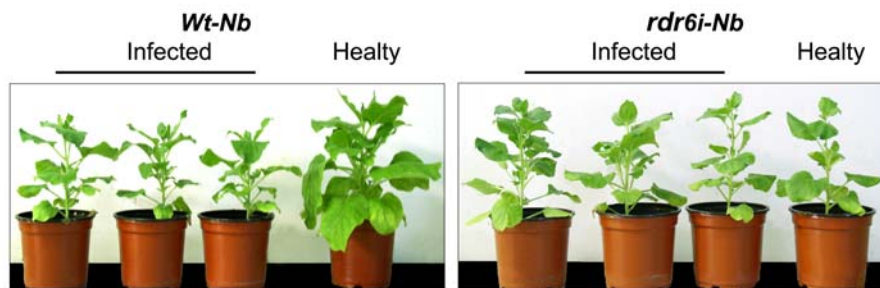

**Supplemental figure 4.** Stunting and severe leaves size reduction induced by HSVd in *Wt-Nb* plants compared with asymptomatic infected *rdr6i-Nb* plants at 45 days post inoculation.
